# Supplementary material for: State-space models reveal a continuing elephant poaching problem in most of Africa
Source: PubMed Central journal article supplement (PMC7311459; doi:10.1038/s41598-020-66906-w), 2020-06-23
Supplement: 41598_2020_66906_MOESM1_ESM.pdf [file 41598_2020_66906_MOESM1_ESM.pdf]

## Supplementary Information

State-space models reveal a continuing elephant poaching problem in most of Africa

Scott Schlossberg<sup>1\*</sup>, Michael J. Chase<sup>1</sup>, Kathleen S. Gobush<sup>2</sup>, Samuel K. Wasser,<sup>2</sup> Keith Lindsay<sup>3</sup>

<sup>1</sup>Elephants Without Borders, PO Box 682, Kasane, Botswana

<sup>2</sup>Department of Biology, University of Washington, Seattle WA 98195, USA

<sup>3</sup>Amboseli Trust for Elephants, PO Box 15135, Langata, Nairobi 00509, Kenya

\*email: xanthocephalus@gmail.com

This supplement includes:

Supplemental Figures S1-S4

Supplemental Table S1

R code to run the state-space models

Supplementary Figure S1. sPIKE estimates for (a) Southern Africa, (b) Eastern Africa, (c) Central Africa, and (d) West Africa. Lines are mean sPIKE estimates. Shading indicates 95% confidence intervals on sPIKE. Circles indicate observed PIKE, and circle area is proportional to the observed total number of carcasses.

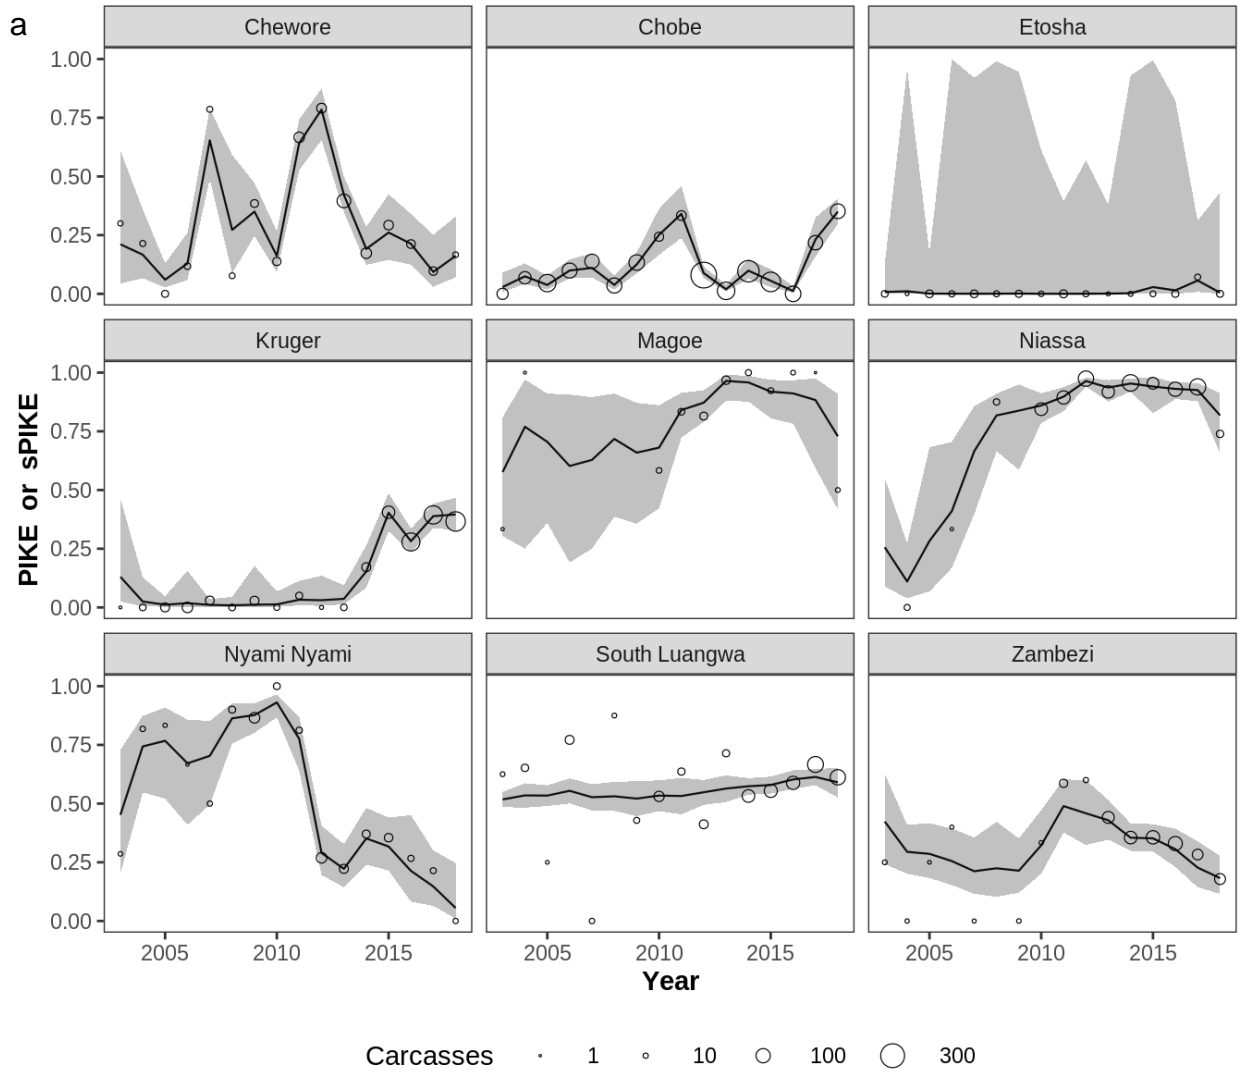

Supplementary Fig. S1 (cont'd)

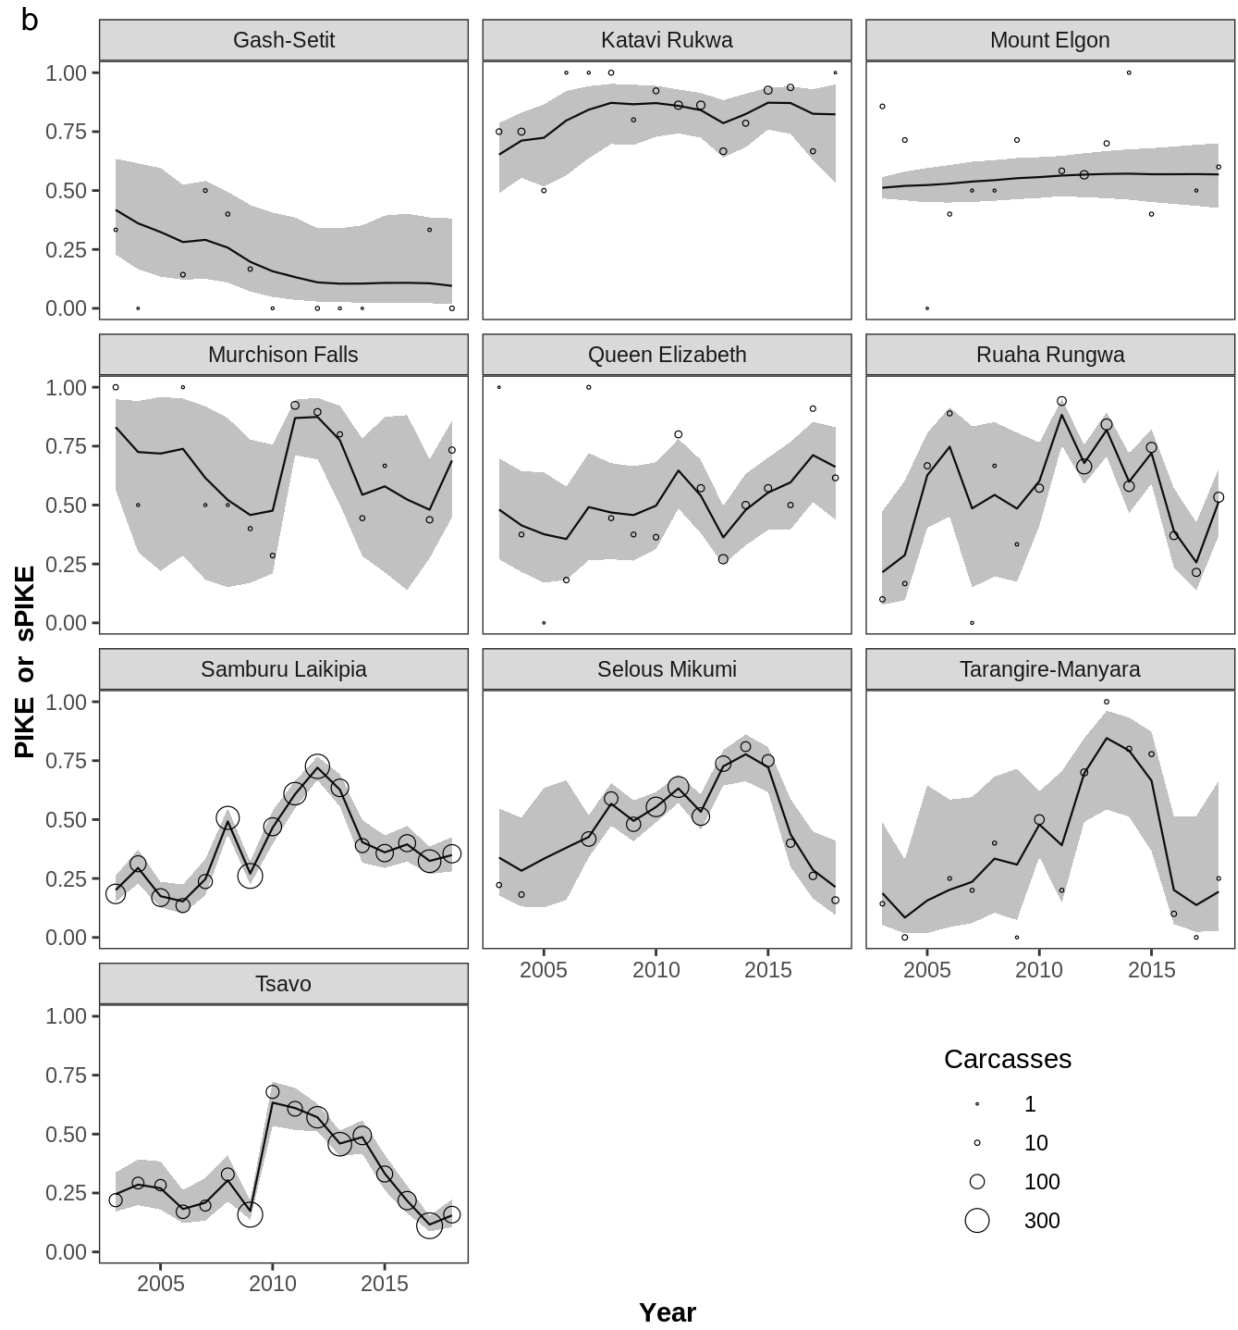

Supplementary Fig. S1 (cont'd)

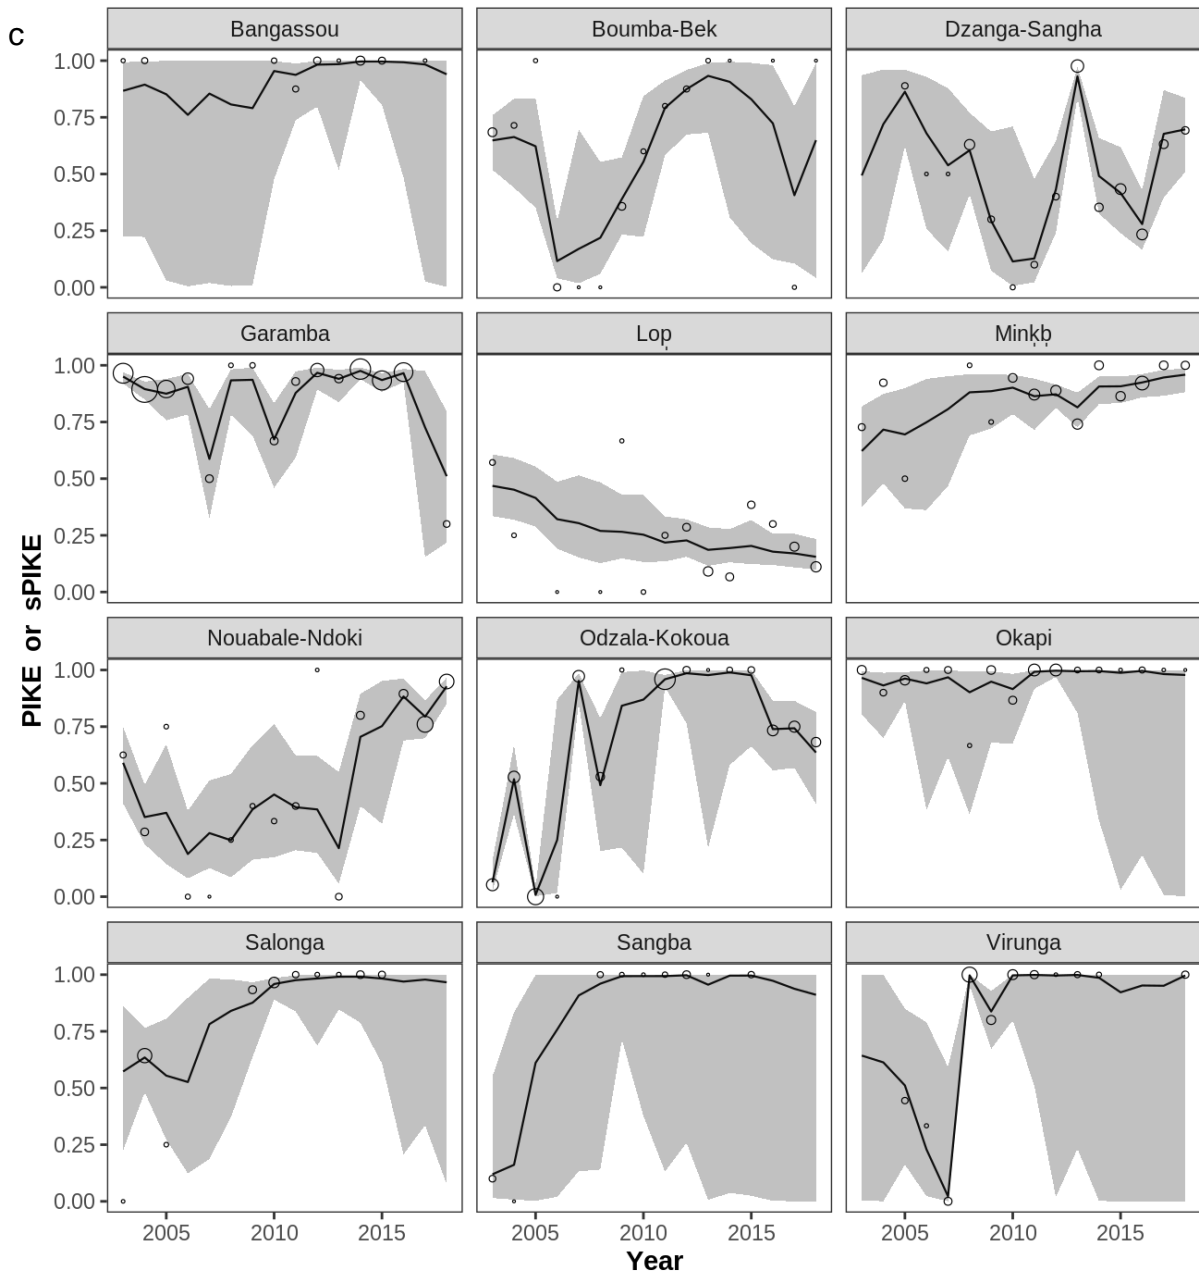

Carcasses · 1 ○ 10 ○ 100

Supplementary Fig. S1 (cont'd)

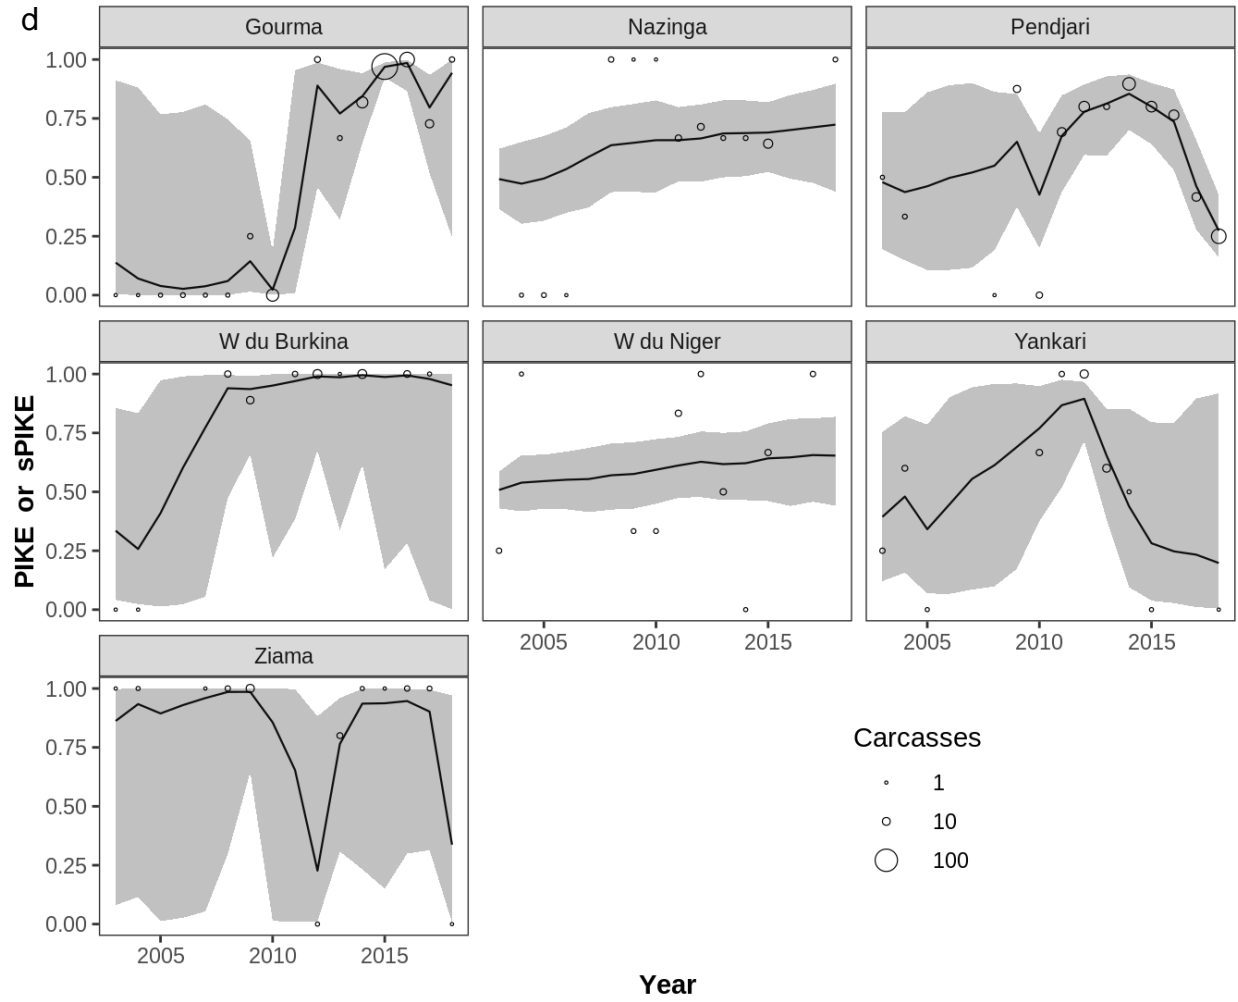

Supplementary Figure S2. (a) Spatial autocorrelation and (b) temporal autocorrelation in residuals of state-space models. Black lines indicate mean autocorrelation, and shading indicates bootstrapped 95% confidence intervals.

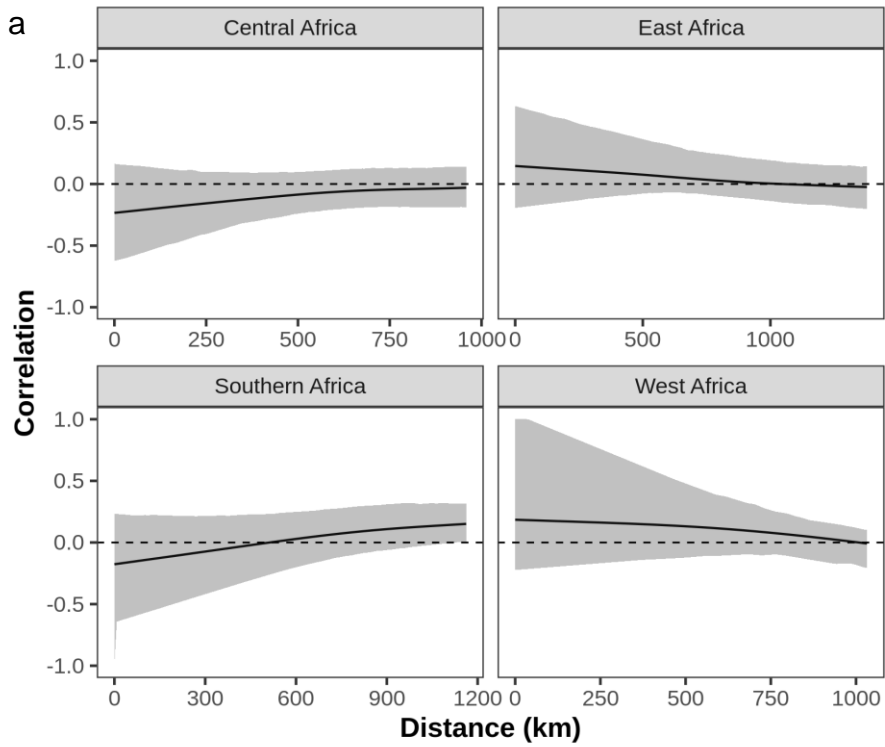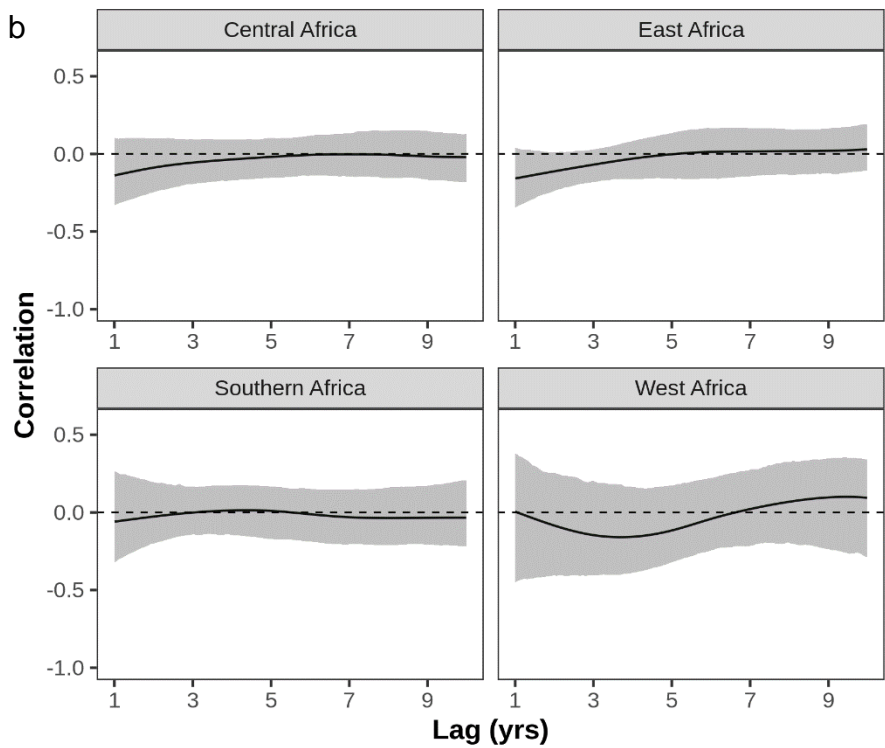

Supplementary Figure S3. Effects of alternate minimum sample sizes on continental sPIKE estimates from the state-space model. Bars indicate mean estimates; error bars indicate 95% confidence intervals.

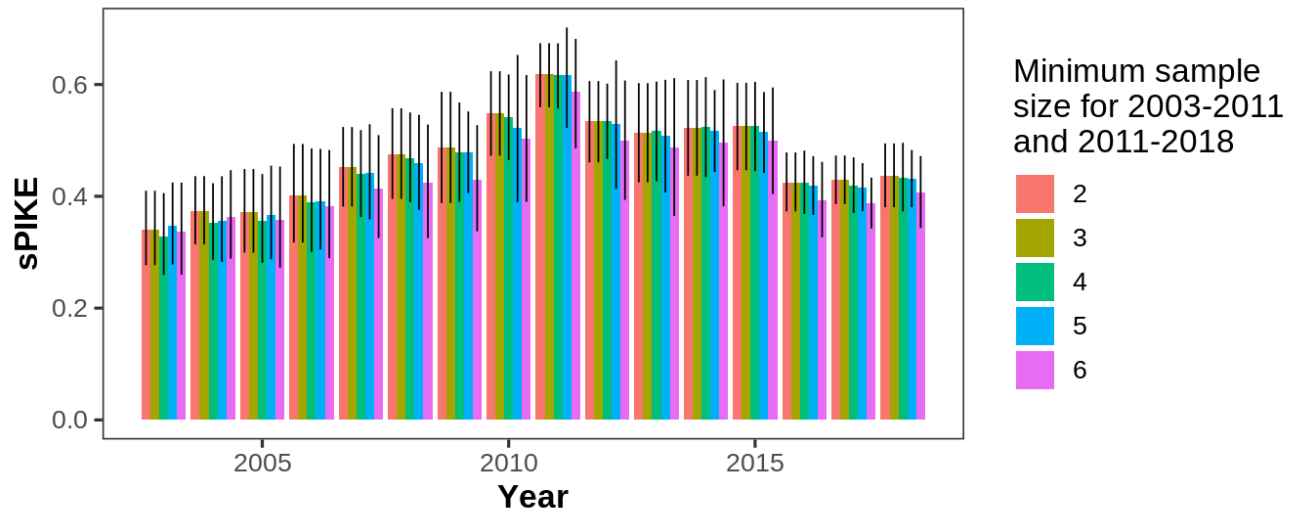

Supplementary Figure S4. (a) Significant temporal autocorrelation and (b) non-normal residuals from the continental least-squares model for PIKE used by CITES. For (b), Shapiro-Wilks test for normality:  $W = 0.98$ ,  $P < 0.001$ .

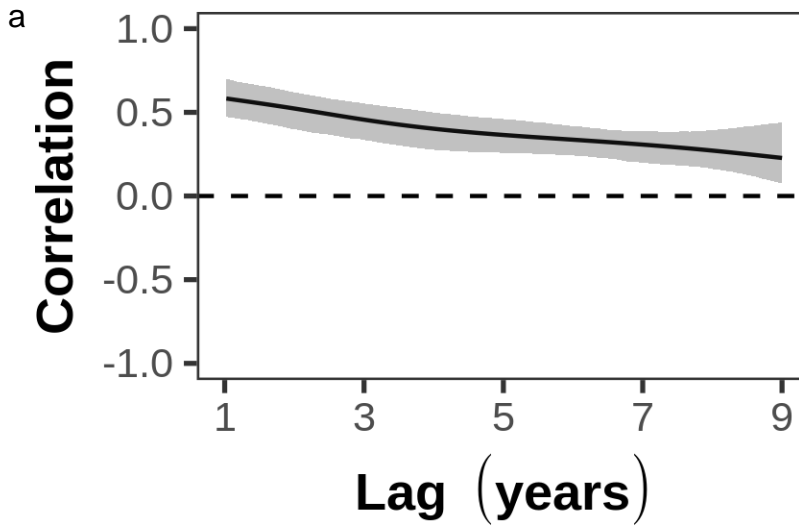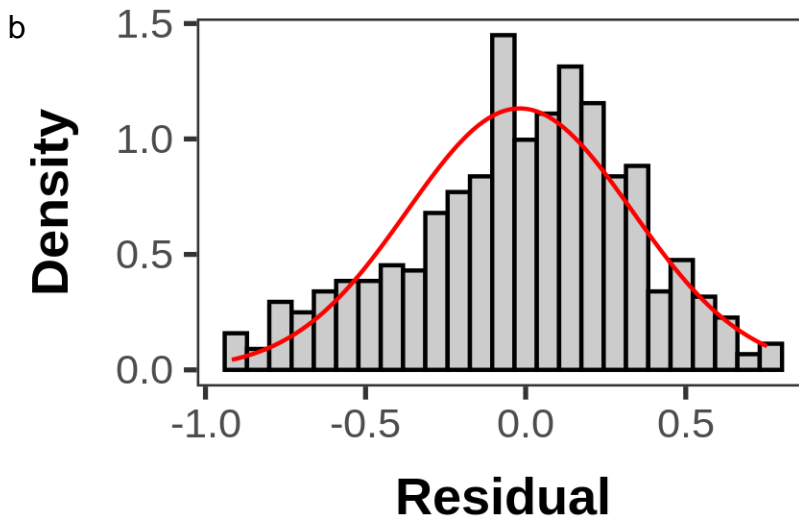



Supplementary Table S1. Estimated elephant populations on MIKE sites by year. Sources refer to reference numbers.

| Country             | Site          | MIKE |      |          |        |
|---------------------|---------------|------|------|----------|--------|
|                     |               | code | Year | Estimate | Source |
| Benin               | Pendjari      | PDJ  | 2003 | 713      | 1      |
| Benin               | Pendjari      | PDJ  | 2015 | 1202     | 2      |
| Benin               | W du Burkina  | WBF  | 2003 | 740      | 1      |
| Benin               | W du Burkina  | WBF  | 2015 | 1040     | 2      |
| Benin               | W du Bénin    | WBJ  | 2003 | 54       | 1      |
| Benin               | W du Bénin    | WBJ  | 2015 | 521      | 2      |
| Benin               | W du Niger    | WNE  | 2003 | 85       | 1      |
| Benin               | W du Niger    | WNE  | 2015 | 0        | 2      |
| Botswana            | Chobe         | CHO  | 2002 | 35317    | 2      |
| Botswana            | Chobe         | CHO  | 2004 | 35570    | 2      |
| Botswana            | Chobe         | CHO  | 2006 | 43417    | 2      |
| Botswana            | Chobe         | CHO  | 2010 | 26609    | 3      |
| Botswana            | Chobe         | CHO  | 2011 | 21061    | 2      |
| Botswana            | Chobe         | CHO  | 2012 | 29468    | 2      |
| Botswana            | Chobe         | CHO  | 2013 | 26598    | 2      |
| Botswana            | Chobe         | CHO  | 2014 | 17448    | 4      |
| Botswana            | Chobe         | CHO  | 2018 | 15404    | 5      |
| Burkina Faso        | Nazinga       | NAZ  | 2003 | 548      | 1      |
| Burkina Faso        | Nazinga       | NAZ  | 2012 | 893      | 6      |
| Cameroon            | Boumba-Bek    | BBK  | 2004 | 318      | 6      |
| Cameroon            | Boumba-Bek    | BBK  | 2008 | 2062     | 6      |
| Cameroon            | Boumba-Bek    | BBK  | 2012 | 2062     | 6      |
| Cameroon            | Boumba-Bek    | BBK  | 2015 | 143      | 6      |
| Cameroon            | Waza          | WAZ  | 2002 | 987.5    | 7      |
| Cameroon            | Waza          | WAZ  | 2007 | 246      | 6      |
| Cent. Afr. Republic | Bangassou     | BGS  | 1998 | 1600     | 6      |
| Cent. Afr. Republic | Bangassou     | BGS  | 2004 | 750      | 6      |
| Cent. Afr. Republic | Dzanga-Sangha | DZA  | 2005 | 1035     | 6      |
| Cent. Afr. Republic | Dzanga-Sangha | DZA  | 2012 | 797      | 6      |
| Cent. Afr. Republic | Sangba        | SGB  | 2005 | 708      | 8      |
| Cent. Afr. Republic | Sangba        | SGB  | 2010 | 68       | 9      |
| Chad                | Zakouma       | ZAK  | 2002 | 4351     | 2      |
| Chad                | Zakouma       | ZAK  | 2005 | 3885     | 2      |
| Chad                | Zakouma       | ZAK  | 2006 | 3020     | 2      |
| Chad                | Zakouma       | ZAK  | 2008 | 937      | 2      |
| Chad                | Zakouma       | ZAK  | 2009 | 617      | 2      |
| Chad                | Zakouma       | ZAK  | 2010 | 542      | 2      |
| Chad                | Zakouma       | ZAK  | 2011 | 454      | 2      |
| Chad                | Zakouma       | ZAK  | 2012 | 444      | 2      |

| <b>Country</b> | <b>Site</b>      | <b>MIKE<br/>code</b> | <b>Year</b> | <b>Estimate</b> | <b>Source</b> |
|----------------|------------------|----------------------|-------------|-----------------|---------------|
| Chad           | Zakouma          | ZAK                  | 2014        | 443             | 2             |
| Congo          | Nouabale-Ndoki   | NDK                  | 2003        | 2652            | 8             |
| Congo          | Nouabale-Ndoki   | NDK                  | 2011        | 2324            | 6             |
| Congo          | Odzala-Kokoua    | ODZ                  | 2005        | 7460            | 7             |
| Congo          | Odzala-Kokoua    | ODZ                  | 2012        | 9292            | 6             |
| Cote d'Ivoire  | Marahoué         | MAR                  | 2002        | 159             | 6             |
| Cote d'Ivoire  | Marahoué         | MAR                  | 2010        | 0               | 6             |
| Cote d'Ivoire  | Taï              | TAI                  | 2002        | 53              | 7             |
| Cote d'Ivoire  | Taï              | TAI                  | 2010        | 189             | 7             |
| DR Congo       | Garamba          | GAR                  | 2007        | 3636            | 2             |
| DR Congo       | Garamba          | GAR                  | 2012        | 1717            | 2             |
| DR Congo       | Garamba          | GAR                  | 2014        | 1156            | 2             |
| DR Congo       | Okapi            | OKP                  | 2006        | 2698            | 7             |
| DR Congo       | Okapi            | OKP                  | 2011        | 1701            | 6             |
| DR Congo       | Salonga          | SAL                  | 2004        | 1186            | 7             |
| DR Congo       | Virunga          | VIR                  | 2003        | 286             | 2             |
| DR Congo       | Virunga          | VIR                  | 2006        | 348             | 2             |
| DR Congo       | Virunga          | VIR                  | 2010        | 347             | 2             |
| DR Congo       | Virunga          | VIR                  | 2014        | 35              | 2             |
| Eritrea        | Gash-Setit       | GSH                  | 2002        | 83              | 6             |
| Eritrea        | Gash-Setit       | GSH                  | 2006        | 104             | 6             |
| Eritrea        | Gash-Setit       | GSH                  | 2012        | 120             | 6             |
| Eritrea        | Gash-Setit       | GSH                  | 2014        | 100             | 6             |
| Ethiopia       | Babille          | BBL                  | 1998        | 65              | 10            |
| Ethiopia       | Babille          | BBL                  | 2005        | 264             | 6             |
| Ethiopia       | Babille          | BBL                  | 2009        | 324             | 6             |
| Ethiopia       | Babille          | BBL                  | 2014        | 250             | 6             |
| Gabon          | Lopé             | LOP                  | 2005        | 2350            | 6             |
| Gabon          | Lopé             | LOP                  | 2009        | 4142            | 6             |
| Gabon          | Minkébé          | MKB                  | 2004        | 34128           | 11            |
| Gabon          | Minkébé          | MKB                  | 2015        | 6956            | 11            |
| Ghana          | Kakum            | KAK                  | 2000        | 294             | 7             |
| Ghana          | Kakum            | KAK                  | 2004        | 164             | 6             |
| Ghana          | Mole             | MOL                  | 2004        | 259             | 12            |
| Ghana          | Mole             | MOL                  | 2006        | 401             | 6             |
| Guinea         | Ziama            | ZIA                  | 2004        | 214             | 7             |
| Guinea         | Ziama            | ZIA                  | 2011        | 101             | 7             |
| Kenya          | Mount Elgon      | EGK                  | 2002        | 139             | 6             |
| Kenya          | Mount Elgon      | EGK                  | 2015        | 200             | 6             |
| Kenya          | Samburu Laikipia | SBR                  | 2002        | 5458            | 13            |
| Kenya          | Samburu Laikipia | SBR                  | 2012        | 6365            | 14            |
| Kenya          | Samburu Laikipia | SBR                  | 2014        | 7134            | 2             |
| Kenya          | Tsavo            | TSV                  | 2005        | 10356           | 15            |

| <b>Country</b> | <b>Site</b>  | <b>MIKE<br/>code</b> | <b>Year</b> | <b>Estimate</b> | <b>Source</b> |
|----------------|--------------|----------------------|-------------|-----------------|---------------|
| Kenya          | Tsavo        | TSV                  | 2008        | 11592           | 16            |
| Kenya          | Tsavo        | TSV                  | 2011        | 12000           | 17            |
| Kenya          | Tsavo        | TSV                  | 2014        | 11144           | 7             |
| Kenya          | Tsavo        | TSV                  | 2014        | 13794           | 2             |
| Liberia        | Sapo         | SAP                  | 2009        | 124             | 7             |
| Malawi         | Kasungu      | KSG                  | 2005        | 58              | 6             |
| Malawi         | Kasungu      | KSG                  | 2014        | 40              | 2             |
| Mali           | Gourma       | GOU                  | 2002        | 322             | 18            |
| Mali           | Gourma       | GOU                  | 2007        | 344             | 19            |
| Mali           | Gourma       | GOU                  | 2015        | 253             | 2             |
| Mozambique     | Limpopo      | LPP                  | 2010        | 1425            | 20            |
| Mozambique     | Limpopo      | LPP                  | 2014        | 1081            | 2             |
| Mozambique     | Magoé        | MAG                  | 2003        | 1628            | 21            |
| Mozambique     | Magoé        | MAG                  | 2010        | 1465            | 22            |
| Mozambique     | Magoé        | MAG                  | 2014        | 1051            | 2             |
| Mozambique     | Niassa       | NIA                  | 2002        | 13061           | 2             |
| Mozambique     | Niassa       | NIA                  | 2004        | 12477           | 2             |
| Mozambique     | Niassa       | NIA                  | 2006        | 11833           | 2             |
| Mozambique     | Niassa       | NIA                  | 2009        | 20364           | 2             |
| Mozambique     | Niassa       | NIA                  | 2011        | 12029           | 2             |
| Mozambique     | Niassa       | NIA                  | 2014        | 4441            | 2             |
| Namibia        | Etosha       | ETO                  | 2002        | 2417            | 6             |
| Namibia        | Etosha       | ETO                  | 2004        | 2057            | 6             |
| Namibia        | Etosha       | ETO                  | 2011        | 3378            | 6             |
| Namibia        | Etosha       | ETO                  | 2012        | 2810            | 7             |
| Namibia        | Etosha       | ETO                  | 2015        | 2911            | 6             |
| Namibia        | Zambezi      | ZBZ                  | 2013        | 4435            | 23            |
| Namibia        | Zambezi      | ZBZ                  | 2015        | 8057            | 6             |
| Nigeria        | Yankari      | YKR                  | 1999        | 328             | 12            |
| Nigeria        | Yankari      | YKR                  | 2006        | 348             | 7             |
| Nigeria        | Yankari      | YKR                  | 2011        | 221.5           | 7             |
| Rwanda         | Akagera      | AKG                  | 2002        | 34              | 6             |
| Rwanda         | Akagera      | AKG                  | 2013        | 88              | 6             |
| Senegal        | Niokolo-Koba | NKK                  | 2002        | 26              | 12            |
| Senegal        | Niokolo-Koba | NKK                  | 2006        | 6               | 12            |
| South Africa   | Kruger       | KRU                  | 2003        | 11672           | 2             |
| South Africa   | Kruger       | KRU                  | 2004        | 11483           | 2             |
| South Africa   | Kruger       | KRU                  | 2005        | 12467           | 2             |
| South Africa   | Kruger       | KRU                  | 2006        | 12427           | 2             |
| South Africa   | Kruger       | KRU                  | 2007        | 13050           | 2             |
| South Africa   | Kruger       | KRU                  | 2008        | 12930           | 2             |
| South Africa   | Kruger       | KRU                  | 2009        | 13573           | 2             |
| South Africa   | Kruger       | KRU                  | 2010        | 13750           | 2             |

| <b>Country</b> | <b>Site</b>       | <b>MIKE<br/>code</b> | <b>Year</b> | <b>Estimate</b> | <b>Source</b> |
|----------------|-------------------|----------------------|-------------|-----------------|---------------|
| South Africa   | Kruger            | KRU                  | 2011        | 14454           | 2             |
| South Africa   | Kruger            | KRU                  | 2012        | 16571           | 2             |
| South Africa   | Kruger            | KRU                  | 2015        | 17086           | 2             |
| Tanzania       | Katavi Rukwa      | KTV                  | 2002        | 5160            | 6             |
| Tanzania       | Katavi Rukwa      | KTV                  | 2007        | 5302            | 6             |
| Tanzania       | Katavi Rukwa      | KTV                  | 2009        | 5359            | 6             |
| Tanzania       | Katavi Rukwa      | KTV                  | 2014        | 3250            | 2             |
| Tanzania       | Mkomazi           | MKZ                  | 2002        | 63              | 17            |
| Tanzania       | Mkomazi           | MKZ                  | 2005        | 41              | 17            |
| Tanzania       | Mkomazi           | MKZ                  | 2008        | 8               | 17            |
| Tanzania       | Mkomazi           | MKZ                  | 2011        | 256             | 7             |
| Tanzania       | Mkomazi           | MKZ                  | 2014        | 59              | 6             |
| Tanzania       | Ruaha Rungwa      | RHR                  | 2013        | 18562           | 24            |
| Tanzania       | Ruaha Rungwa      | RHR                  | 2014        | 7769            | 2             |
| Tanzania       | Selous Mikumi     | SEL                  | 2002        | 41021           | 6             |
| Tanzania       | Selous Mikumi     | SEL                  | 2013        | 10546           | 25            |
| Tanzania       | Selous Mikumi     | SEL                  | 2014        | 12304           | 2             |
| Tanzania       | Tarangire-Manyara | TGR                  | 2000        | 2370            | 2             |
| Tanzania       | Tarangire-Manyara | TGR                  | 2004        | 1886            | 2             |
| Tanzania       | Tarangire-Manyara | TGR                  | 2006        | 1755            | 2             |
| Tanzania       | Tarangire-Manyara | TGR                  | 2009        | 2245            | 2             |
| Tanzania       | Tarangire-Manyara | TGR                  | 2014        | 4095            | 2             |
| Togo           | Fazao Mafakassa   | FAZ                  | 2002        | 61              | 6             |
| Togo           | Fazao Mafakassa   | FAZ                  | 2016        | 80              | 6             |
| Uganda         | Murchison Falls   | MCH                  | 2005        | 516             | 2             |
| Uganda         | Murchison Falls   | MCH                  | 2010        | 904             | 2             |
| Uganda         | Murchison Falls   | MCH                  | 2012        | 1617            | 2             |
| Uganda         | Murchison Falls   | MCH                  | 2014        | 1330            | 2             |
| Uganda         | Queen Elizabeth   | QEZ                  | 2000        | 1086            | 2             |
| Uganda         | Queen Elizabeth   | QEZ                  | 2002        | 998             | 2             |
| Uganda         | Queen Elizabeth   | QEZ                  | 2004        | 2497            | 2             |
| Uganda         | Queen Elizabeth   | QEZ                  | 2006        | 2959            | 2             |
| Uganda         | Queen Elizabeth   | QEZ                  | 2010        | 2502            | 2             |
| Uganda         | Queen Elizabeth   | QEZ                  | 2012        | 3018            | 2             |
| Uganda         | Queen Elizabeth   | QEZ                  | 2014        | 2913            | 2             |
| Zambia         | South Luangwa     | SLW                  | 2002        | 4459            | 6             |
| Zambia         | South Luangwa     | SLW                  | 2009        | 4419            | 26            |
| Zambia         | South Luangwa     | SLW                  | 2011        | 3855            | 6             |
| Zambia         | South Luangwa     | SLW                  | 2012        | 2813            | 6             |
| Zambia         | South Luangwa     | SLW                  | 2015        | 3302            | 2             |
| Zimbabwe       | Chewore           | CHE                  | 2001        | 5741            | 27            |
| Zimbabwe       | Chewore           | CHE                  | 2010        | 5048            | 28            |
| Zimbabwe       | Chewore           | CHE                  | 2014        | 3303            | 2             |

| <b>Country</b> | <b>Site</b> | <b>MIKE<br/>code</b> | <b>Year</b> | <b>Estimate</b> | <b>Source</b> |
|----------------|-------------|----------------------|-------------|-----------------|---------------|
| Zimbabwe       | Nyami Nyami | NYA                  | 2001        | 2372            | 6             |
| Zimbabwe       | Nyami Nyami | NYA                  | 2006        | 3715            | 6             |
| Zimbabwe       | Nyami Nyami | NYA                  | 2014        | 411             | 2             |

## References

1. Bouché, P., Lungren, C., Hien, B. & Omondi, P. *Aerial total count of the “W”-Arly-Pendjari-Oti-Mandouri-Keran (WAPOK) ecosystem in west Africa*. CITES–MIKE/ECOPAS/PAUCOF (2004).
2. Chase, M. J. *et al.* Continent-wide survey reveals massive decline in african savannah elephants. *PeerJ* **4**,e2354; 10.7717/peerj.2354 (2016).
3. Chase, M. *Dry season fixed-wing aerial survey of elephants and wildlife in northern Botswana, September - November 2010*. Elephants Without Borders, [http://elephantswithoutborders.org/downloads/papers/EWB\\_2010\\_BW\\_Survey.pdf](http://elephantswithoutborders.org/downloads/papers/EWB_2010_BW_Survey.pdf) (2011).
4. Chase, M. *et al.* *Dry season aerial survey of elephants and wildlife in northern Botswana, July - October 2014*. Elephants Without Borders (2015).
5. Chase, M. J. & Schlossberg, S. *Dry season aerial survey of elephants and wildlife in northern Botswana*. Elephants Without Borders (2019).
6. IUCN. Elephant database. [http://www.elephantdatabase.org/preview\\_report/2013\\_africa\\_final/Loxodonta\\_africana/2013/Africa](http://www.elephantdatabase.org/preview_report/2013_africa_final/Loxodonta_africana/2013/Africa) (2013).
7. Thouless, C. R. *et al.* *African elephant status report 2016: an update from the African Elephant Database*. Occasional paper of the IUCN Species Survival Commission no. 60 (2016).

8. Blake, S. *Central African forests: final report on population surveys (2003-2004)*. March 2005. CITES MIKE (2005).
9. Bouché, P. *Inventaire aerien 2010 des grands mammifères dans le nord de la République Centafricaine*.  
[http://africanelephantdatabase.org/system/population\\_submission\\_attachments/files/000/000/116/original/svyFCCFSGB2010AS.pdf](http://africanelephantdatabase.org/system/population_submission_attachments/files/000/000/116/original/svyFCCFSGB2010AS.pdf) (2010).
10. Blanc, J. J. *et al. African elephant status report 2002: an update from the African Elephant Database*. IUCN/SSC African Elephant Specialist Group (2003).
11. Poulsen, J. R. *et al. Poaching empties critical central African wilderness of forest elephants*. *Current Biology* **27**,R134–R135; 10.1016/j.cub.2017.01.023 (2017).
12. Blanc, J. J. *et al. African elephant status report 2007: an update from the African Elephant Database*. IUCN/SSC African Elephant Specialist Group (2007).
13. Omondi, P., Bitok, E., Kahindi, O. & Mayienda, R. *Total Aerial Count of Elephants in Samburu-Laikipia EcoSystem: June 2002*. Kenya Wildlife Service, Elephant Programme (2002).
14. Ngene, S. *et al. Total aerial count of elephants, Grevy's zebra and other large mammals in Laikipia-Samburu-Marsabit ecosystem in (November 2012)*. Kenya Wildlife Service (2013).
15. Omondi, P. & Bitok, E. *Total aerial count of elephants, buffalo and other species in the Tsavo/Mkomazi ecosystem*. Kenya Wildlife Service, Elephant Programme (2005).
16. Omondi, P., Bitok, E., Mukeka, J., Mayienda, R. & Litoroh, M. *Total aerial count of elephants and other large mammal species of Tsavo/Mkomazi ecosystem*. Kenya Wildlife Service (2008).

17. Ngene, S. *et al.* *Total aerial census of elephants and other large mammals in the Tsavo-Mkomazi ecosystem*. Kenya Wildlife Service (2011).
18. Blake, S., Bouché, P., Rasmussen, H., Orlando, A. & Douglas-Hamilton, I. *The last Sahelian elephants: ranging behavior, population status, and recent history of the desert elephants of Mali*. Save the Elephants (2003).
19. Bouché, P. *Dénombrement des éléphants du Gourma*. IUCN & Projet de Conservation et de Valorisation de la Biodiversité du Gourma et des éléphants République du Mali, [http://africanelephantdatabase.org/population\\_submission\\_attachments/148](http://africanelephantdatabase.org/population_submission_attachments/148) (2007).
20. Stephenson, A. *Parque Nacional do Limpopo aerial wildlife census*. Wildlife Management Services (2010).
21. Dunham, K. M. *Aerial survey of elephants and other large herbivores in the Zambezi heartland (Zimbabwe, Mozambique, Zambia) 2003*. Africa Wildlife Foundation (2004).
22. Dunham, K. M. *Aerial survey of elephants and other large herbivores south of Lake Cabora Bassa, Mozambique: 2010*. AGRECO G.E.I.E., [http://africanelephantdatabase.org/system/population\\_submission\\_attachments/files/000/000/069/original/svyFSMZCBA2010AS.pdf](http://africanelephantdatabase.org/system/population_submission_attachments/files/000/000/069/original/svyFSMZCBA2010AS.pdf) (2010).
23. Craig, G. C. & Gibson, D. St. C. *Aerial survey of elephants and other wildlife in the Caprivi, May-June 2013*. World Wildlife Fund, [http://africanelephantdatabase.org/system/population\\_submission\\_attachments/files/000/000/367/original/svyFSNACAP2013AS.pdf](http://africanelephantdatabase.org/system/population_submission_attachments/files/000/000/367/original/svyFSNACAP2013AS.pdf) (2013).
24. TAWIRI. *Aerial census of large animals in the Ruaha-Rungwa Ecosystem, dry season 2013*. (2013).

25. TAWIRI. *Aerial census of large animals in the Selous-Mikumi Ecosystem, Dry Season 2013*. (2013).
26. WCS Flight Programme. *Aerial survey report: Luangwa Valley 2009*. Wildlife Conservation Society (2009).
27. Mackie, C. S. *Aerial census of elephants and other large herbivores in the Zambezi Valley, Zimbabwe: 2001*. DNPWM/WWF (2002).
28. Kuvawoga, P. T. & Gandiwa, E. *Aerial survey of elephants and other large herbivores in Chewore Safari Area, Zambezi Valley: 2010*. CITES MIKE Programme, [http://africanelephantdatabase.org/population\\_submission\\_attachments/455](http://africanelephantdatabase.org/population_submission_attachments/455) (2011).



## R Code to Conduct Analyses in the Paper

```
# Following is code to run the analyses in "State-space models reveal a continuing elephant poaching
# problem in most of Africa" by Schlossberg et al.

require(MASS)      # needed to use ginv(), the generalized inverse of a matrix
require(KFAS)      # package for running Kalman filter/smoothing
require(car)       # needed to access a fast wcrossprod function
require(dplyr)
require(tidyr)
require(tibble)
require(psych)
require(ggplot2)
require(purrr)
require(furrr)
require(zoo)
options(stringsAsFactors = F)

#####
#                               Import and format data                               #
#####

#load MIKE data, available from https://www.cites.org/eng/prog/mike/index.php#Access%20to%20MIKE%20Data
# column names: "continent", "region", "regionID", "country", "ccode", "site", "site.name", "year", "tot", "ill"
# tot = total number of carcasses reported; ill = number of illegally killed carcasses
mike=read.csv("mike_data.csv")

#load elephant population estimates (available in Supplementary Table S1) and join with MIKE data
ests=read.csv("population_estimates.csv") %>% as_tibble
mike.ests=full_join(mike, ests %>% select(-country,-site.name),by=c("site","year"))

#remove 2 sites with no elephant population size estimates
mike.ests= mike.ests %>% group_by(site) %>% filter(!all(is.na(estimate))) %>% ungroup
```

```

#linear interpolation of elephant population estimates for missing years

mike.ests=mike.ests %>% arrange(country,site,year) %>% group_by(site) %>% nest()
interpolate=function(df) {
  df.loc=df
  #add any missing years for 2003-2018
  df.loc=complete(df.loc,year=2003:2018,fill=
    list(region=df.loc$region[1],regionID=df.loc$regionID[1],site.name=df.loc$site.name[1],
    country=df.loc$country[1])) %>% arrange(desc(year))
  #if only one estimate is available, use it for all years
  if(sum(!is.na(df.loc$estimate))==1) {
    df.loc$estimate.interp=df.loc$estimate[!is.na(df.loc$estimate)]
    return(df.loc)
  }
  nas=which(is.na(df.loc$estimate))
  ests.loc=df.loc$estimate
  interp=na.approx(zoo(x=df.loc$estimate),xout=nas) #Linear interpolation
  ests.loc[index(interp)]=interp
  #assign values prior to the earliest survey or after the latest survey
  ests.loc[(1:length(ests.loc)) > max(which(!is.na(df.loc$estimate)))]=
    ests.loc[max(which(!is.na(df.loc$estimate)))]
  ests.loc[(1:length(ests.loc)) < min(which(!is.na(df.loc$estimate)))]=
    ests.loc[min(which(!is.na(df.loc$estimate)))]
  df.loc$estimate.interp=ests.loc
  df.loc=filter(df.loc,year>2002) #2003 is the earliest year for analysis
  return(df.loc)
}
#run the interpolation and clean up
mike.ests=mike.ests %>% mutate(data=map(data, interpolate)) %>% unnest(data)
rm(ests,mike,interpolate)

#replace missing value for total carcasses with 10 (this is a placeholder and does not affect results;
# model cannot accept missing values for denominator)
mike.ests=mike.ests %>% mutate(tot=replace(tot,tot==0,NA))

```

```
#####
#                               Run the Kalman smoother                               #
#####

#function to run Kalman smoother for one region

runmods=function(rgn, min.pre=4, min.post=4) {
  #rgn = one regionID from "mike.ests" as a string
  #min.pre = minimum number of years with data for 2003-2011 to include a site in the analysis
  #min.post = minimum number of years with data for 2011-2018 to include a site in the analysis

  #select data from "mike.ests"
  mike=mike.ests %>% filter(regionID==rgn) %>%
    group_by(site) %>%
    filter(sum(!is.na(tot[year<=2011]))>=min.pre & sum(!is.na(tot[year>=2011]))>=min.post) %>%
    ungroup() %>%
    mutate(tot=replace_na(tot,10))

  #create matrices with numbers of illegally killed and all carcasses; rows = years, columns = sites
  df.mv=mike %>% pivot_wider(values_from=c(ill,tot),names_from=site,id_cols=year)
  ill=df.mv %>% select_at(vars(matches("ill"))) %>% as.matrix #illegally killed carcasses
  tot=df.mv %>% select_at(vars(matches("tot"))) %>% as.matrix #all carcasses
  n_sites=length(unique(mike$site))

  #set up model
  model = SSMModel(ill ~ -1+
    SSMcustom(Z = diag(1, n_sites), T = diag(1, n_sites),
      Q = diag(NA,n_sites),
      P1 = matrix(NA, n_sites,n_sites)),distribution = "binomial",u = tot)
  updatefn <- function(pars, model, ...) {
    Q <- diag(pars[1:n_sites])
    model["Q", etas = "custom"] <- model["P1", states = "custom"] <-crossprod(Q)
    model
  }

  #create initial estimates for SPIKE using actual PIKE values
  pike.init=ill/tot
  #because estimation is on the logit scale, 1's and 0's are not allowed in initial values
  pike.init[pike.init==1]=.9
  pike.init[is.na(pike.init)|pike.init==0]=.1
  init <- chol(cov(logit(pike.init)))
}
```

```

#calculate initial values for process error variance
fitinit <- fitSSM(model, updatefn = updatefn,
  inits = rep(c(log(diag(init)), init[upper.tri(init)]), 2),
  method = "BFGS")

#calculate final values for covariance
fit <- fitSSM(model, updatefn = updatefn, inits = fitinit$optim.out$par,
  method = "BFGS", nsim=250)

#run filtering and smoothing algorithm (by default, KFS function filters and smooths)
out=KFS(fit$model, nsim=1000)

return(list(model=out, data=mike))
}

#run models for each region using parallel processing to reduce time required
plan(multisession,workers=4) #set up cluster
models=future_map(c("FS","FE","FW","FC"),runmods,.progress=T)
names(models)=c("FS","FE","FW","FC")

#####
#                               Summarize model results                               #
#####

#get predicted SPIKE values by site and year
#fit = estimate on logit scale
#lwr/upr = lower and upper 95% confidence limits
#se.fit = standard error of estimate on logit scale

SPIKE_by_site = map_dfr(models,~{
  pred=fitted(.x$model) %>% as.matrix %>% logit
  n=dim(.x$model$V) [1]
  ses=map(1:n, function(site) sqrt(.x$model$V[site,site])) %>% do.call(cbind,..)
  tibble(fit=gdata::unmatrix(pred),se.fit=gdata::unmatrix(ses)) %>% cbind(.x$data,..) %>%
    mutate(lwr=fit-1.96*se.fit,upr=fit+1.96*se.fit)
})

```

```

#plot predicted and actual values for individual sites by region on probability (not logit) scale

plot.region=function(reg) { #reg = 2-letter regionID value
  df=sPIKE_by_site %>% mutate_at(vars(matches("^fit$|lwr|upr")),psych::logistic) %>%
    filter(regionID==reg)
  ggplot(df,aes(year,fit))+
    geom_line(size=.25)+geom_ribbon(aes(ymin=lwr,ymax=upr),alpha=.3)+
    geom_point(aes(y=ill/tot,size=tot),fill=NA,shape=1,stroke=.2)+
      scale_size_area("Carcasses",max_size=3,breaks=c(1,10,100,300))+
    facet_wrap(~site.name,ncol=3)+theme_bw(7)+
    theme(aspect.ratio=0.7,panel.grid=element_blank(),legend.key.height=unit(0.7,"lines"))+
    xlab(expression(bold(Year)))+ylab(expression(bold(PIKE)))
}

plot.region("FS")+theme(legend.position="bottom")
plot.region("FE")+theme(legend.position=c(.8,.1))
plot.region("FC")+theme(legend.position=c(.83,.12))
plot.region("FW")+theme(legend.position=c(.72,.15))

#####
#                               Calculate regional sPIKE                               #
#####

#regional predicted values from KFAS model
sPIKE_by_region=

#duplicate site data.frame to create a new region for entire continent with regionID = "AFR"
bind_rows(sPIKE_by_site, sPIKE_by_site %>% mutate(region="All Africa",regionID="AFR")) %>%
  group_by(region, regionID, year) %>%

#calculate weight for combining sites = (est. # of live elephants)/(sum of est. # of live elephants)
mutate(weight=estimate.interp/sum(estimate.interp)) %>%
  summarize(n=sum(tot,na.rm=T),sPIKE=sum(logistic(fit)*weight),
    se_logit=sqrt(sum(se.fit^2*weight^2)), #logit scale std. error of sPIKE
    se_p=sPIKE*(1-sPIKE)*se_logit, #probability scale std. error of sPIKE via delta method
    #calculate sPIKE +/- 1 SE on probability scale
    sPIKE_se_upper=logistic(logit(sPIKE)+se_logit),sPIKE_se_lower=logistic(logit(sPIKE)-se_logit),
    #calculate sPIKE 95% confidence limits on probability scale
    lcl_p=logistic(logit(sPIKE)-se_logit*1.96),ucl_p=logistic(logit(sPIKE)+se_logit*1.96)) %>%
  ungroup()

```

```

#plot regional results including confidence regions for +/- 1 SE and +/- 95% CI

gplot(sPIKE_by_region, aes(year, sPIKE)) + geom_line()+
  geom_ribbon(aes(ymin=lcl_p,ymax=ucl_p),alpha=.3)+
  geom_ribbon(aes(ymin=sPIKE_se_lower,ymax=sPIKE_se_upper),alpha=.5)+
  facet_wrap(~region)+theme_bw(13)+theme(aspect.ratio=.7,panel.grid=element_blank()+
  xlab(expression(bold(Year)))+ylab(expression(bold(sPIKE)))

#####
#                               Calculate trends in sPIKE by region                               #
#####

#Feasible generalized least squares method from Lewis and Linzer (2005)
tr=function(x) { sum(diag(x)) } #trace of a square matrix

#function to run FGLS model

edvreg <- function(mod,omegasq,proportional=FALSE) {
  # edvreg
  #   mod: Regression formula
  #
  #   omegasq: Nx1 vector of estimated sampling/error variances of the dependent variable
  #
  #   proportional: "True" if omegasq is only proportional to the sampling/error variances of
  #                 of the dependent variables
  #
  # Example call: res <- edvreg( y ~ x, omegasq = est.var.y )
  #
  # Some housekeeping stolen from John Fox's corchrane-orcutt implementation
  X <- model.matrix(mod)
  xnames <- colnames(X)
  y <- model.response(model.frame(mod))

  # When omegasq is known up to a proportion (for example 1/N_i) ...
  if (proportional) {
    residsq <- (resid(lm(y~X-1)))^2
    steptwo <- lm(residsq~omegasq)
    zeroeps <- FALSE
    if (coef(steptwo)[1] < 0) {
      warning("Variance of epsilon estimated to be negative! Setting to 0...")
    }
  }
}

```

```

      steptwo <- lm(residsq~0+omegasq)
      zeroeps <- TRUE
    }
    predval <- fitted.values(steptwo)
    if (sum(predval<0) < 0) {
      warning("Negative omegaSq estimates encountered, setting to 0.0001")
      predval[predval<0] <- 0.0001 # error check against very rare possibility of negative weight
    }
    model.FGLS <- lm(y~X-1,weights=(1/predval))
    model.FGLS$vareps <- ifelse(zeroeps,0,steptwo$coefficients[1])
    model.FGLS$omegasqFactor <- ifelse(zeroeps,steptwo$coefficients[1],steptwo$coefficients[2])
    model.FGLS$predval <- predval
  }
  # When omegasq is known exactly...
  else {
    N <- nrow(X)
    sigmahatsq <- (sum((residuals(lm(y~X-1)))^2) - sum(omegasq) +
      tr(ginv(crossprod(X)) %*% wcrossprod(X,X,w=omegasq)))/(N-ncol(X)-1)
    if (sigmahatsq < 0) {
      warning(sprintf("SigmaHatSq estimated to be %7.4f, setting to 0...",sigmahatsq))
      sigmahatsq <- 0.0
    }
    w <- 1/(omegasq+sigmahatsq)
    model.FGLS <- lm(y~X-1, weights=w)
    model.FGLS$sigmahatsq <- sigmahatsq
  }
  names(model.FGLS$coefficients) <- xnames
  model.FGLS
}

#run models and summarize results for state-space models

trends_region=sPIKE_by_region %>% mutate(time=ifelse(year<=2010,"2003-2010","2011-2018")) %>%
  group_by(region,time) %>% nest %>%
  mutate(reg=map(data,~broom::tidy(edvreg(.x$sPIKE)~.x$year,.x$se_p^2)) %>% slice(2))) %>%
  unnest(cols=reg) %>% ungroup() %>% select(-data,-term) %>% mutate(type="State-space")

```
